# Supplementary material
Source: PubMed Central journal article supplement (PMC3432440)

**A**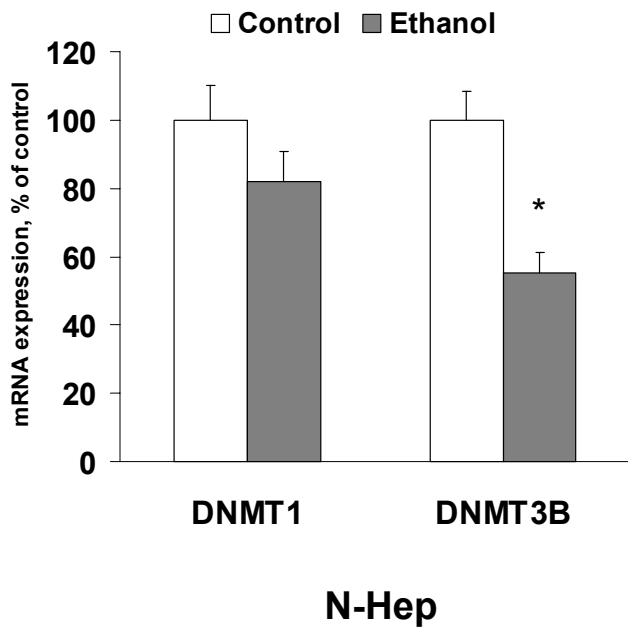**B**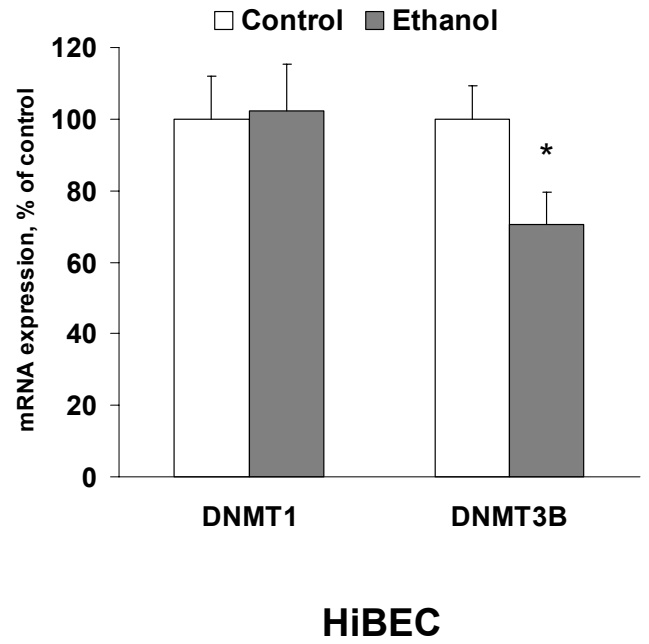

Supplement: mmc1.pdf [file mmc1.pdf]

# Enrichment in CpG island in the 5'-promoter region of miR-34a

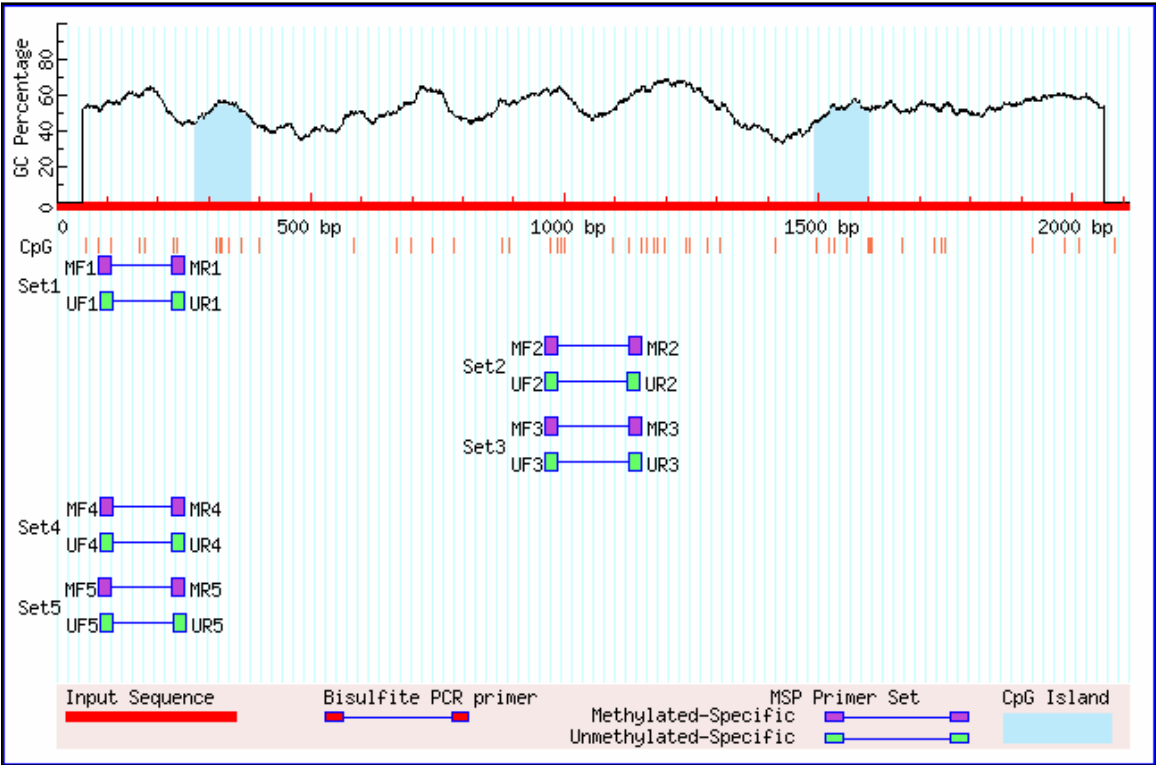

Supplementary Fig. 2

Supplement: mmc2.pdf [file mmc2.pdf]

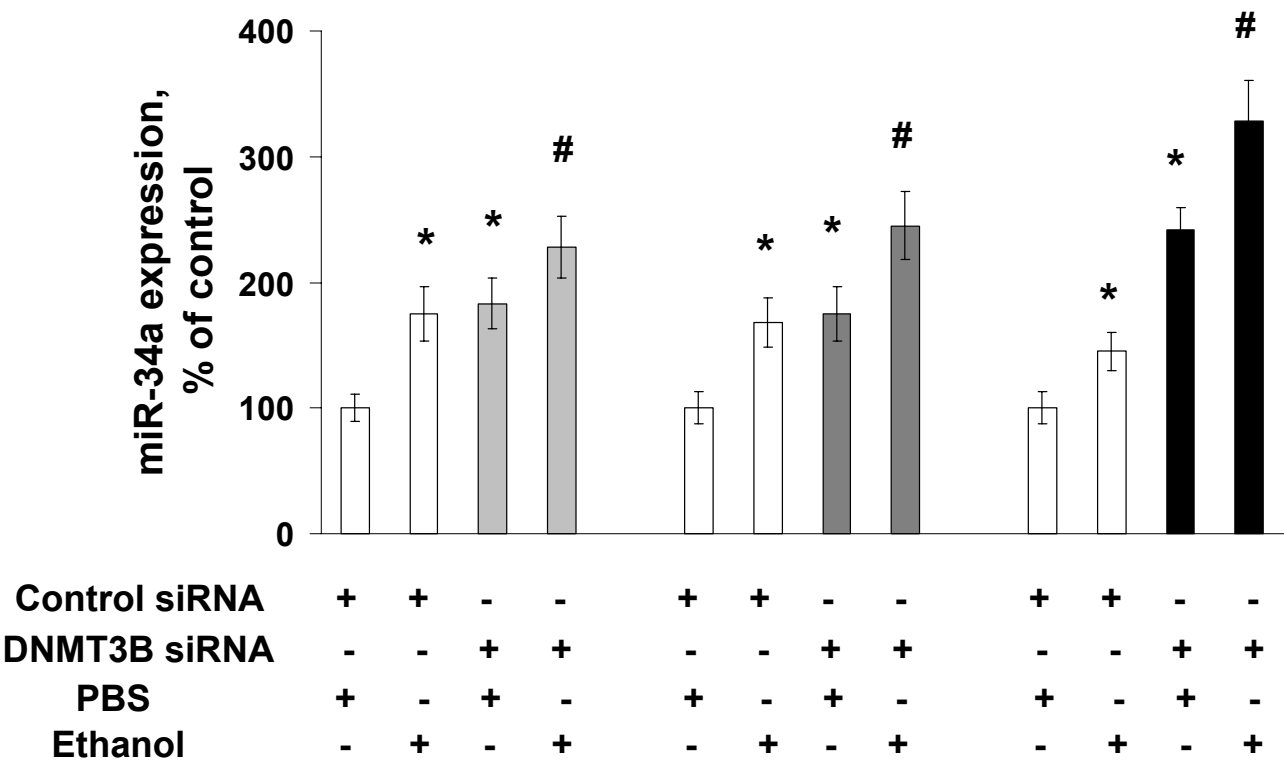

Supplementary Fig. 3

Supplement: mmc3.pdf [file mmc3.pdf]
